# Supplementary material for: Eutrophication influences diversity and community-level change points of mycoplankton in subtropical estuaries
Source: Front Microbiol. 2025 Jun 27;16:1620942. doi: 10.3389/fmicb.2025.1620942 (PMC12245875; doi:10.3389/fmicb.2025.1620942)
Supplement: Supplementary file 2 [file Table_1.xlsx]

## Sheet: Sheet1
Table S1. Environmental parameters of the sample in Dafengjiang River Estuary.
Station	Temperature (℃)	Salinity	pH	DO (mg/L)	NO3--N(mg/L)	NO2--N(mg/L)	NH4+-N(mg/L)	DIN(mg/L)	DIP(mg/L)	Chl-a(μg/L)	TOC(mg/L)	COD(mg/L)	TN(mg/L)	TP(mg/L)	EI
18SP_01.1	25.47	21.6	7.99	6.7	0.799	0.018	0.109	0.926	0.028	9.3	3.28	2.76	1.481	0.067	15.9
18SP_01.2	25.47	21.6	7.99	6.7	0.799	0.018	0.109	0.926	0.028	9.3	3.28	2.76	1.481	0.067	15.9
18SP_01.3	25.47	21.6	7.97	6.7	0.799	0.018	0.109	0.926	0.028	9.3	3.28	2.76	1.481	0.067	15.9
18SP_01.4	25.47	21.6	8	6.7	0.799	0.018	0.109	0.926	0.028	9.3	3.28	2.76	1.481	0.067	15.9
18SP_01.5	25.47	21.6	7.98	6.7	0.799	0.018	0.109	0.926	0.028	9.3	3.28	2.76	1.481	0.067	15.9
18SP_02.1	24.84	21.02	8.01	6.5	0.824	0.017	0.097	0.938	0.018	10.6	3.2	2.73	1.78	0.037	10.24
18SP_02.2	24.84	21.02	8	6.5	0.824	0.017	0.097	0.938	0.018	10.6	3.2	2.73	1.78	0.037	10.24
18SP_02.3	24.84	21.02	8	6.5	0.824	0.017	0.097	0.938	0.018	10.6	3.2	2.73	1.78	0.037	10.24
18SP_02.4	24.84	21.02	8.02	6.5	0.824	0.017	0.097	0.938	0.018	10.6	3.2	2.73	1.78	0.037	10.24
18SP_02.5	24.84	21.02	8	6.5	0.824	0.017	0.097	0.938	0.018	10.6	3.2	2.73	1.78	0.037	10.24
18SP_03.1	24.9	22.64	8.03	6.3	0.597	0.012	0.062	0.671	0.017	5.9	2.85	2.52	1.265	0.038	6.39
18SP_03.2	24.9	22.64	8.03	6.3	0.597	0.012	0.062	0.671	0.017	5.9	2.85	2.52	1.265	0.038	6.39
18SP_03.3	24.9	22.64	8.03	6.3	0.597	0.012	0.062	0.671	0.017	5.9	2.85	2.52	1.265	0.038	6.39
18SP_03.4	24.9	22.64	8.02	6.3	0.597	0.012	0.062	0.671	0.017	5.9	2.85	2.52	1.265	0.038	6.39
18SP_03.5	24.9	22.64	8.05	6.3	0.597	0.012	0.062	0.671	0.017	5.9	2.85	2.52	1.265	0.038	6.39
18SP_04.1	24.37	23.16	8.11	6.3	0.387	0.008	0.058	0.453	0.012	4.2	3.19	2.64	0.905	0.026	3.19
18SP_04.2	24.37	23.16	8.09	6.3	0.387	0.008	0.058	0.453	0.012	4.2	3.19	2.64	0.905	0.026	3.19
18SP_04.3	24.37	23.16	8.09	6.3	0.387	0.008	0.058	0.453	0.012	4.2	3.19	2.64	0.905	0.026	3.19
18SP_04.4	24.37	23.16	8.1	6.3	0.387	0.008	0.058	0.453	0.012	4.2	3.19	2.64	0.905	0.026	3.19
18SP_04.5	24.37	23.16	8.1	6.3	0.387	0.008	0.058	0.453	0.012	4.2	3.19	2.64	0.905	0.026	3.19
18SP_05.1	24.75	23.73	8.06	6.5	0.395	0.009	0.06	0.464	0.013	3.1	2.89	2.54	0.698	0.029	3.4
18SP_05.2	24.75	23.73	8.05	6.5	0.395	0.009	0.06	0.464	0.013	3.1	2.89	2.54	0.698	0.029	3.4
18SP_05.3	24.75	23.73	8.07	6.5	0.395	0.009	0.06	0.464	0.013	3.1	2.89	2.54	0.698	0.029	3.4
18SP_05.4	24.75	23.73	8.07	6.5	0.395	0.009	0.06	0.464	0.013	3.1	2.89	2.54	0.698	0.029	3.4
18SP_05.5	24.75	23.73	8.08	6.5	0.395	0.009	0.06	0.464	0.013	3.1	2.89	2.54	0.698	0.029	3.4
18SP_06.1	24.46	25.17	8.15	6.7	0.343	0.008	0.059	0.41	0.012	4.5	2.69	2.46	0.564	0.029	2.69
18SP_06.2	24.46	25.17	8.15	6.7	0.343	0.008	0.059	0.41	0.012	4.5	2.69	2.46	0.564	0.029	2.69
18SP_06.3	24.46	25.17	8.13	6.7	0.343	0.008	0.059	0.41	0.012	4.5	2.69	2.46	0.564	0.029	2.69
18SP_06.4	24.46	25.17	8.14	6.7	0.343	0.008	0.059	0.41	0.012	4.5	2.69	2.46	0.564	0.029	2.69
18SP_06.5	24.46	25.17	8.13	6.7	0.343	0.008	0.059	0.41	0.012	4.5	2.69	2.46	0.564	0.029	2.69
18SP_07.1	24.15	26.24	8.1	6.7	0.328	0.007	0.049	0.384	0.012	4.9	2.16	2.35	0.469	0.029	2.41
18SP_07.2	24.15	26.24	8.08	6.7	0.328	0.007	0.049	0.384	0.012	4.9	2.16	2.35	0.469	0.029	2.41
18SP_07.3	24.15	26.24	8.1	6.7	0.328	0.007	0.049	0.384	0.012	4.9	2.16	2.35	0.469	0.029	2.41
18SP_07.4	24.15	26.24	8.07	6.7	0.328	0.007	0.049	0.384	0.012	4.9	2.16	2.35	0.469	0.029	2.41
18SP_07.5	24.15	26.24	8.07	6.7	0.328	0.007	0.049	0.384	0.012	4.9	2.16	2.35	0.469	0.029	2.41
18SP_09.1	25.6	26.9	8.21	7.2	0.176	0.008	0.035	0.219	0.028	6.7	2.46	2.18	0.303	0.055	2.97
18SP_09.2	25.6	26.9	8.21	7.2	0.176	0.008	0.035	0.219	0.028	6.7	2.46	2.18	0.303	0.055	2.97
18SP_09.3	25.6	26.9	8.22	7.2	0.176	0.008	0.035	0.219	0.028	6.7	2.46	2.18	0.303	0.055	2.97
18SP_09.4	25.6	26.9	8.19	7.2	0.176	0.008	0.035	0.219	0.028	6.7	2.46	2.18	0.303	0.055	2.97
18SP_09.5	25.6	26.9	8.22	7.2	0.176	0.008	0.035	0.219	0.028	6.7	2.46	2.18	0.303	0.055	2.97
18SP_10.1	26.6	26.76	8.07	7.6	0.129	0.008	0.025	0.162	0.038	8.7	1.93	2.14	0.266	0.07	2.93
18SP_10.2	26.6	26.76	8.07	7.6	0.129	0.008	0.025	0.162	0.038	8.7	1.93	2.14	0.266	0.07	2.93
18SP_10.3	26.6	26.76	8.1	7.6	0.129	0.008	0.025	0.162	0.038	8.7	1.93	2.14	0.266	0.07	2.93
18SP_10.4	26.6	26.76	8.07	7.6	0.129	0.008	0.025	0.162	0.038	8.7	1.93	2.14	0.266	0.07	2.93
18SP_10.5	26.6	26.76	8.07	7.6	0.129	0.008	0.025	0.162	0.038	8.7	1.93	2.14	0.266	0.07	2.93
18SP_11.1	24.6	29.44	8.08	7.1	0.147	0.005	0.026	0.178	0.029	7.4	2.28	1.94	0.241	0.062	2.23
18SP_11.2	24.6	29.44	8.09	7.1	0.147	0.005	0.026	0.178	0.029	7.4	2.28	1.94	0.241	0.062	2.23
18SP_11.3	24.6	29.44	8.09	7.1	0.147	0.005	0.026	0.178	0.029	7.4	2.28	1.94	0.241	0.062	2.23
18SP_11.4	24.6	29.44	8.08	7.1	0.147	0.005	0.026	0.178	0.029	7.4	2.28	1.94	0.241	0.062	2.23
18SP_11.5	24.6	29.44	8.1	7.1	0.147	0.005	0.026	0.178	0.029	7.4	2.28	1.94	0.241	0.062	2.23
18SP_12.1	23.8	29.85	8.17	6.9	0.173	0.006	0.024	0.203	0.019	3	1.97	1.43	0.28	0.044	1.23
18SP_12.2	23.8	29.85	8.16	6.9	0.173	0.006	0.024	0.203	0.019	3	1.97	1.43	0.28	0.044	1.23
18SP_12.3	23.8	29.85	8.14	6.9	0.173	0.006	0.024	0.203	0.019	3	1.97	1.43	0.28	0.044	1.23
18SP_12.4	23.8	29.85	8.17	6.9	0.173	0.006	0.024	0.203	0.019	3	1.97	1.43	0.28	0.044	1.23
18SP_12.5	23.8	29.85	8.16	6.9	0.173	0.006	0.024	0.203	0.019	3	1.97	1.43	0.28	0.044	1.23
18SP_13.1	25.08	29.45	8.03	7.1	0.169	0.006	0.04	0.215	0.022	4.9	2.02	1.24	0.29	0.053	1.3
18SP_13.2	25.08	29.45	8.06	7.1	0.169	0.006	0.04	0.215	0.022	4.9	2.02	1.24	0.29	0.053	1.3
18SP_13.3	25.08	29.45	8.03	7.1	0.169	0.006	0.04	0.215	0.022	4.9	2.02	1.24	0.29	0.053	1.3
18SP_13.4	25.08	29.45	8.06	7.1	0.169	0.006	0.04	0.215	0.022	4.9	2.02	1.24	0.29	0.053	1.3
18SP_13.5	25.08	29.45	8.06	7.1	0.169	0.006	0.04	0.215	0.022	4.9	2.02	1.24	0.29	0.053	1.3
18SP_15.1	25.33	30.21	8.14	6.7	0.184	0.008	0.017	0.209	0.023	7.8	2.08	1.34	0.308	0.055	1.43
18SP_15.2	25.33	30.21	8.15	6.7	0.184	0.008	0.017	0.209	0.023	7.8	2.08	1.34	0.308	0.055	1.43
18SP_15.3	25.33	30.21	8.14	6.7	0.184	0.008	0.017	0.209	0.023	7.8	2.08	1.34	0.308	0.055	1.43
18SP_15.4	25.33	30.21	8.13	6.7	0.184	0.008	0.017	0.209	0.023	7.8	2.08	1.34	0.308	0.055	1.43
18SP_15.5	25.33	30.21	8.13	6.7	0.184	0.008	0.017	0.209	0.023	7.8	2.08	1.34	0.308	0.055	1.43
18SP_16.1	25.6	30.23	8.14	6.8	0.142	0.005	0.035	0.182	0.023	6.1	2.03	1.26	0.267	0.055	1.17
18SP_16.2	25.6	30.23	8.12	6.8	0.142	0.005	0.035	0.182	0.023	6.1	2.03	1.26	0.267	0.055	1.17
18SP_16.3	25.6	30.23	8.13	6.8	0.142	0.005	0.035	0.182	0.023	6.1	2.03	1.26	0.267	0.055	1.17
18SP_16.4	25.6	30.23	8.12	6.8	0.142	0.005	0.035	0.182	0.023	6.1	2.03	1.26	0.267	0.055	1.17
18SP_16.5	25.6	30.23	8.13	6.8	0.142	0.005	0.035	0.182	0.023	6.1	2.03	1.26	0.267	0.055	1.17
18SU_01.1	29.77	17.35	7.79	5.2	0.598	0.204	0.073	0.875	0.028	3.6	4.27	2.48	1.148	0.054	13.5
18SU_01.2	29.77	17.35	7.8	5.2	0.598	0.204	0.073	0.875	0.028	3.6	4.27	2.48	1.148	0.054	13.5
18SU_01.3	29.77	17.35	7.81	5.2	0.598	0.204	0.073	0.875	0.028	3.6	4.27	2.48	1.148	0.054	13.5
18SU_01.4	29.77	17.35	7.82	5.2	0.598	0.204	0.073	0.875	0.028	3.6	4.27	2.48	1.148	0.054	13.5
18SU_01.5	29.77	17.35	7.82	5.2	0.598	0.204	0.073	0.875	0.028	3.6	4.27	2.48	1.148	0.054	13.5
18SU_02.1	29.69	17.72	7.76	5.5	0.617	0.08	0.067	0.764	0.025	3.6	4.03	2.65	0.935	0.047	11.25
18SU_02.2	29.69	17.72	7.78	5.5	0.617	0.08	0.067	0.764	0.025	3.6	4.03	2.65	0.935	0.047	11.25
18SU_02.3	29.69	17.72	7.76	5.5	0.617	0.08	0.067	0.764	0.025	3.6	4.03	2.65	0.935	0.047	11.25
18SU_02.4	29.69	17.72	7.79	5.5	0.617	0.08	0.067	0.764	0.025	3.6	4.03	2.65	0.935	0.047	11.25
18SU_02.5	29.69	17.72	7.78	5.5	0.617	0.08	0.067	0.764	0.025	3.6	4.03	2.65	0.935	0.047	11.25
18SU_03.1	29.65	18.83	7.84	5.4	0.672	0.182	0.099	0.953	0.021	4.4	3.78	2.48	1.056	0.04	11.03
18SU_03.2	29.65	18.83	7.83	5.4	0.672	0.182	0.099	0.953	0.021	4.4	3.78	2.48	1.056	0.04	11.03
18SU_03.3	29.65	18.83	7.82	5.4	0.672	0.182	0.099	0.953	0.021	4.4	3.78	2.48	1.056	0.04	11.03
18SU_03.4	29.65	18.83	7.83	5.4	0.672	0.182	0.099	0.953	0.021	4.4	3.78	2.48	1.056	0.04	11.03
18SU_03.5	29.65	18.83	7.84	5.4	0.672	0.182	0.099	0.953	0.021	4.4	3.78	2.48	1.056	0.04	11.03
18SU_04.1	29.67	18.76	7.89	5.4	0.48	0.162	0.06	0.702	0.033	5.8	2.92	2.26	0.822	0.082	11.63
18SU_04.2	29.67	18.76	7.9	5.4	0.48	0.162	0.06	0.702	0.033	5.8	2.92	2.26	0.822	0.082	11.63
18SU_04.3	29.67	18.76	7.87	5.4	0.48	0.162	0.06	0.702	0.033	5.8	2.92	2.26	0.822	0.082	11.63
18SU_04.4	29.67	18.76	7.89	5.4	0.48	0.162	0.06	0.702	0.033	5.8	2.92	2.26	0.822	0.082	11.63
18SU_04.5	29.67	18.76	7.89	5.4	0.48	0.162	0.06	0.702	0.033	5.8	2.92	2.26	0.822	0.082	11.63
18SU_05.1	29.56	19.1	7.86	5.6	0.504	0.12	0.057	0.681	0.028	3.3	2.49	2.47	0.812	0.064	10.47
18SU_05.2	29.56	19.1	7.86	5.6	0.504	0.12	0.057	0.681	0.028	3.3	2.49	2.47	0.812	0.064	10.47
18SU_05.3	29.56	19.1	7.87	5.6	0.504	0.12	0.057	0.681	0.028	3.3	2.49	2.47	0.812	0.064	10.47
18SU_05.4	29.56	19.1	7.87	5.6	0.504	0.12	0.057	0.681	0.028	3.3	2.49	2.47	0.812	0.064	10.47
18SU_05.5	29.56	19.1	7.85	5.6	0.504	0.12	0.057	0.681	0.028	3.3	2.49	2.47	0.812	0.064	10.47
18SU_06.1	29.3	24.21	7.82	5.8	0.336	0.104	0.06	0.5	0.038	5.1	2.71	2.57	0.663	0.082	10.85
18SU_06.2	29.3	24.21	7.83	5.8	0.336	0.104	0.06	0.5	0.038	5.1	2.71	2.57	0.663	0.082	10.85
18SU_06.3	29.3	24.21	7.85	5.8	0.336	0.104	0.06	0.5	0.038	5.1	2.71	2.57	0.663	0.082	10.85
18SU_06.4	29.3	24.21	7.85	5.8	0.336	0.104	0.06	0.5	0.038	5.1	2.71	2.57	0.663	0.082	10.85
18SU_06.5	29.3	24.21	7.83	5.8	0.336	0.104	0.06	0.5	0.038	5.1	2.71	2.57	0.663	0.082	10.85
18SU_07.1	29.28	24.79	7.88	5.8	0.342	0.093	0.068	0.503	0.031	5.1	2.47	2.27	0.706	0.068	7.87
18SU_07.2	29.28	24.79	7.89	5.8	0.342	0.093	0.068	0.503	0.031	5.1	2.47	2.27	0.706	0.068	7.87
18SU_07.3	29.28	24.79	7.9	5.8	0.342	0.093	0.068	0.503	0.031	5.1	2.47	2.27	0.706	0.068	7.87
18SU_07.4	29.28	24.79	7.87	5.8	0.342	0.093	0.068	0.503	0.031	5.1	2.47	2.27	0.706	0.068	7.87
18SU_07.5	29.28	24.79	7.88	5.8	0.342	0.093	0.068	0.503	0.031	5.1	2.47	2.27	0.706	0.068	7.87
18SU_09.1	29.28	26	8	6.5	0.324	0.014	0.069	0.407	0.034	4.5	2.33	2	0.631	0.082	6.15
18SU_09.2	29.28	26	8.01	6.5	0.324	0.014	0.069	0.407	0.034	4.5	2.33	2	0.631	0.082	6.15
18SU_09.3	29.28	26	8.02	6.5	0.324	0.014	0.069	0.407	0.034	4.5	2.33	2	0.631	0.082	6.15
18SU_09.4	29.28	26	8	6.5	0.324	0.014	0.069	0.407	0.034	4.5	2.33	2	0.631	0.082	6.15
18SU_09.5	29.28	26	8.02	6.5	0.324	0.014	0.069	0.407	0.034	4.5	2.33	2	0.631	0.082	6.15
18SU_10.1	29.37	26.95	7.9	6.4	0.296	0.012	0.067	0.375	0.028	5.2	2.54	2.16	0.532	0.07	5.04
18SU_10.2	29.37	26.95	7.91	6.4	0.296	0.012	0.067	0.375	0.028	5.2	2.54	2.16	0.532	0.07	5.04
18SU_10.3	29.37	26.95	7.9	6.4	0.296	0.012	0.067	0.375	0.028	5.2	2.54	2.16	0.532	0.07	5.04
18SU_10.4	29.37	26.95	7.92	6.4	0.296	0.012	0.067	0.375	0.028	5.2	2.54	2.16	0.532	0.07	5.04
18SU_10.5	29.37	26.95	7.89	6.4	0.296	0.012	0.067	0.375	0.028	5.2	2.54	2.16	0.532	0.07	5.04
18SU_11.1	29.22	28.5	8.05	6.2	0.312	0.023	0.07	0.405	0.027	3.7	2.16	2.13	0.501	0.049	5.18
18SU_11.2	29.22	28.5	8.07	6.2	0.312	0.023	0.07	0.405	0.027	3.7	2.16	2.13	0.501	0.049	5.18
18SU_11.3	29.22	28.5	8.04	6.2	0.312	0.023	0.07	0.405	0.027	3.7	2.16	2.13	0.501	0.049	5.18
18SU_11.4	29.22	28.5	8.04	6.2	0.312	0.023	0.07	0.405	0.027	3.7	2.16	2.13	0.501	0.049	5.18
18SU_11.5	29.22	28.5	8.07	6.2	0.312	0.023	0.07	0.405	0.027	3.7	2.16	2.13	0.501	0.049	5.18
18SU_12.1	29.38	29.36	7.99	6.1	0.262	0.013	0.068	0.343	0.027	2.4	2.4	1.82	0.562	0.066	3.75
18SU_12.2	29.38	29.36	7.99	6.1	0.262	0.013	0.068	0.343	0.027	2.4	2.4	1.82	0.562	0.066	3.75
18SU_12.3	29.38	29.36	7.98	6.1	0.262	0.013	0.068	0.343	0.027	2.4	2.4	1.82	0.562	0.066	3.75
18SU_12.4	29.38	29.36	8	6.1	0.262	0.013	0.068	0.343	0.027	2.4	2.4	1.82	0.562	0.066	3.75
18SU_12.5	29.38	29.36	7.98	6.1	0.262	0.013	0.068	0.343	0.027	2.4	2.4	1.82	0.562	0.066	3.75
18SU_13.1	29.46	29.68	8.12	6.7	0.126	0.009	0.046	0.181	0.027	3.7	2.31	1.56	0.35	0.058	1.69
18SU_13.2	29.46	29.68	8.09	6.7	0.126	0.009	0.046	0.181	0.027	3.7	2.31	1.56	0.35	0.058	1.69
18SU_13.3	29.46	29.68	8.09	6.7	0.126	0.009	0.046	0.181	0.027	3.7	2.31	1.56	0.35	0.058	1.69
18SU_13.4	29.46	29.68	8.1	6.7	0.126	0.009	0.046	0.181	0.027	3.7	2.31	1.56	0.35	0.058	1.69
18SU_13.5	29.46	29.68	8.11	6.7	0.126	0.009	0.046	0.181	0.027	3.7	2.31	1.56	0.35	0.058	1.69
18SU_14.1	29.16	30.89	7.97	6.4	0.107	0.016	0.049	0.172	0.026	4.9	1.89	1.65	0.331	0.055	1.64
18SU_14.2	29.16	30.89	7.99	6.4	0.107	0.016	0.049	0.172	0.026	4.9	1.89	1.65	0.331	0.055	1.64
18SU_14.3	29.16	30.89	7.99	6.4	0.107	0.016	0.049	0.172	0.026	4.9	1.89	1.65	0.331	0.055	1.64
18SU_14.4	29.16	30.89	7.97	6.4	0.107	0.016	0.049	0.172	0.026	4.9	1.89	1.65	0.331	0.055	1.64
18SU_14.5	29.16	30.89	7.99	6.4	0.107	0.016	0.049	0.172	0.026	4.9	1.89	1.65	0.331	0.055	1.64
18SU_15.1	29.43	30.16	7.98	6.3	0.106	0.019	0.043	0.168	0.024	2.9	2.21	1.18	0.256	0.046	1.06
18SU_15.2	29.43	30.16	7.98	6.3	0.106	0.019	0.043	0.168	0.024	2.9	2.21	1.18	0.256	0.046	1.06
18SU_15.3	29.43	30.16	7.97	6.3	0.106	0.019	0.043	0.168	0.024	2.9	2.21	1.18	0.256	0.046	1.06
18SU_15.4	29.43	30.16	7.98	6.3	0.106	0.019	0.043	0.168	0.024	2.9	2.21	1.18	0.256	0.046	1.06
18SU_15.5	29.43	30.16	7.96	6.3	0.106	0.019	0.043	0.168	0.024	2.9	2.21	1.18	0.256	0.046	1.06
18SU_16.1	29.66	29.87	8.05	6.3	0.123	0.008	0.044	0.175	0.017	2.9	2.22	1.29	0.269	0.031	0.85
18SU_16.2	29.66	29.87	8.04	6.3	0.123	0.008	0.044	0.175	0.017	2.9	2.22	1.29	0.269	0.031	0.85
18SU_16.3	29.66	29.87	8.05	6.3	0.123	0.008	0.044	0.175	0.017	2.9	2.22	1.29	0.269	0.031	0.85
18SU_16.4	29.66	29.87	8.03	6.3	0.123	0.008	0.044	0.175	0.017	2.9	2.22	1.29	0.269	0.031	0.85
18SU_16.5	29.66	29.87	8.05	6.3	0.123	0.008	0.044	0.175	0.017	2.9	2.22	1.29	0.269	0.031	0.85
18FA_01.1	26.3	20.12	7.73	6.7	0.606	0.072	0.06	0.738	0.046	1.6	4.19	2.35	1.369	0.115	17.73
18FA_01.2	26.3	20.12	7.73	6.7	0.606	0.072	0.06	0.738	0.046	1.6	4.19	2.35	1.369	0.115	17.73
18FA_01.3	26.3	20.12	7.73	6.7	0.606	0.072	0.06	0.738	0.046	1.6	4.19	2.35	1.369	0.115	17.73
18FA_01.4	26.3	20.12	7.73	6.7	0.606	0.072	0.06	0.738	0.046	1.6	4.19	2.35	1.369	0.115	17.73
18FA_01.5	26.3	20.12	7.73	6.7	0.606	0.072	0.06	0.738	0.046	1.6	4.19	2.35	1.369	0.115	17.73
18FA_02.1	26	19.68	7.83	6.8	0.586	0.047	0.075	0.708	0.04	1.8	3.91	2.73	1.028	0.1	17.18
18FA_02.2	26	19.68	7.83	6.8	0.586	0.047	0.075	0.708	0.04	1.8	3.91	2.73	1.028	0.1	17.18
18FA_02.3	26	19.68	7.83	6.8	0.586	0.047	0.075	0.708	0.04	1.8	3.91	2.73	1.028	0.1	17.18
18FA_02.4	26	19.68	7.83	6.8	0.586	0.047	0.075	0.708	0.04	1.8	3.91	2.73	1.028	0.1	17.18
18FA_02.5	26	19.68	7.83	6.8	0.586	0.047	0.075	0.708	0.04	1.8	3.91	2.73	1.028	0.1	17.18
18FA_03.1	20.18	20.32	7.77	6.8	0.548	0.049	0.092	0.689	0.021	1.7	3.6	2.68	1.224	0.047	8.62
18FA_03.2	20.18	20.32	7.77	6.8	0.548	0.049	0.092	0.689	0.021	1.7	3.6	2.68	1.224	0.047	8.62
18FA_03.3	20.18	20.32	7.77	6.8	0.548	0.049	0.092	0.689	0.021	1.7	3.6	2.68	1.224	0.047	8.62
18FA_03.4	20.18	20.32	7.77	6.8	0.548	0.049	0.092	0.689	0.021	1.7	3.6	2.68	1.224	0.047	8.62
18FA_03.5	20.18	20.32	7.77	6.8	0.548	0.049	0.092	0.689	0.021	1.7	3.6	2.68	1.224	0.047	8.62
18FA_04.1	26	21.12	7.83	6.8	0.557	0.079	0.103	0.739	0.015	2	3.17	2.23	1.127	0.032	5.49
18FA_04.2	26	21.12	7.83	6.8	0.557	0.079	0.103	0.739	0.015	2	3.17	2.23	1.127	0.032	5.49
18FA_04.3	26	21.12	7.83	6.8	0.557	0.079	0.103	0.739	0.015	2	3.17	2.23	1.127	0.032	5.49
18FA_04.4	26	21.12	7.83	6.8	0.557	0.079	0.103	0.739	0.015	2	3.17	2.23	1.127	0.032	5.49
18FA_04.5	26	21.12	7.83	6.8	0.557	0.079	0.103	0.739	0.015	2	3.17	2.23	1.127	0.032	5.49
18FA_05.1	26	23.35	7.79	6.9	0.461	0.03	0.1	0.591	0.02	2.9	2.77	2.42	0.977	0.04	6.36
18FA_05.2	26	23.35	7.79	6.9	0.461	0.03	0.1	0.591	0.02	2.9	2.77	2.42	0.977	0.04	6.36
18FA_05.3	26	23.35	7.79	6.9	0.461	0.03	0.1	0.591	0.02	2.9	2.77	2.42	0.977	0.04	6.36
18FA_05.4	26	23.35	7.79	6.9	0.461	0.03	0.1	0.591	0.02	2.9	2.77	2.42	0.977	0.04	6.36
18FA_05.5	26	23.35	7.79	6.9	0.461	0.03	0.1	0.591	0.02	2.9	2.77	2.42	0.977	0.04	6.36
18FA_06.1	26	26.05	7.93	6.9	0.529	0.034	0.085	0.648	0.016	2.4	2.79	1.9	0.967	0.038	4.38
18FA_06.2	26	26.05	7.93	6.9	0.529	0.034	0.085	0.648	0.016	2.4	2.79	1.9	0.967	0.038	4.38
18FA_06.3	26	26.05	7.93	6.9	0.529	0.034	0.085	0.648	0.016	2.4	2.79	1.9	0.967	0.038	4.38
18FA_06.4	26	26.05	7.93	6.9	0.529	0.034	0.085	0.648	0.016	2.4	2.79	1.9	0.967	0.038	4.38
18FA_06.5	26	26.05	7.93	6.9	0.529	0.034	0.085	0.648	0.016	2.4	2.79	1.9	0.967	0.038	4.38
18FA_07.1	27.1	27.24	7.97	7	0.468	0.023	0.069	0.56	0.02	2.5	2.42	2.06	0.952	0.042	5.13
18FA_07.2	27.1	27.24	7.97	7	0.468	0.023	0.069	0.56	0.02	2.5	2.42	2.06	0.952	0.042	5.13
18FA_07.3	27.1	27.24	7.97	7	0.468	0.023	0.069	0.56	0.02	2.5	2.42	2.06	0.952	0.042	5.13
18FA_07.4	27.1	27.24	7.97	7	0.468	0.023	0.069	0.56	0.02	2.5	2.42	2.06	0.952	0.042	5.13
18FA_07.5	27.1	27.24	7.97	7	0.468	0.023	0.069	0.56	0.02	2.5	2.42	2.06	0.952	0.042	5.13
18FA_09.1	27.6	28.32	8.07	6.9	0.331	0.006	0.074	0.411	0.025	3.1	2.59	1.66	0.567	0.057	3.79
18FA_09.2	27.6	28.32	8.07	6.9	0.331	0.006	0.074	0.411	0.025	3.1	2.59	1.66	0.567	0.057	3.79
18FA_09.3	27.6	28.32	8.07	6.9	0.331	0.006	0.074	0.411	0.025	3.1	2.59	1.66	0.567	0.057	3.79
18FA_09.4	27.6	28.32	8.07	6.9	0.331	0.006	0.074	0.411	0.025	3.1	2.59	1.66	0.567	0.057	3.79
18FA_09.5	27.6	28.32	8.07	6.9	0.331	0.006	0.074	0.411	0.025	3.1	2.59	1.66	0.567	0.057	3.79
18FA_10.1	27.3	27.68	8.05	7.1	0.235	0.018	0.088	0.341	0.021	4.1	2.42	1.7	0.442	0.049	2.71
18FA_10.2	27.3	27.68	8.05	7.1	0.235	0.018	0.088	0.341	0.021	4.1	2.42	1.7	0.442	0.049	2.71
18FA_10.3	27.3	27.68	8.05	7.1	0.235	0.018	0.088	0.341	0.021	4.1	2.42	1.7	0.442	0.049	2.71
18FA_10.4	27.3	27.68	8.05	7.1	0.235	0.018	0.088	0.341	0.021	4.1	2.42	1.7	0.442	0.049	2.71
18FA_10.5	27.3	27.68	8.05	7.1	0.235	0.018	0.088	0.341	0.021	4.1	2.42	1.7	0.442	0.049	2.71
18FA_11.1	27.5	31.84	8.05	7.2	0.279	0.005	0.086	0.37	0.018	2	2.2	1.37	0.44	0.045	2.03
18FA_11.2	27.5	31.84	8.05	7.2	0.279	0.005	0.086	0.37	0.018	2	2.2	1.37	0.44	0.045	2.03
18FA_11.3	27.5	31.84	8.05	7.2	0.279	0.005	0.086	0.37	0.018	2	2.2	1.37	0.44	0.045	2.03
18FA_11.4	27.5	31.84	8.05	7.2	0.279	0.005	0.086	0.37	0.018	2	2.2	1.37	0.44	0.045	2.03
18FA_11.5	27.5	31.84	8.05	7.2	0.279	0.005	0.086	0.37	0.018	2	2.2	1.37	0.44	0.045	2.03
18FA_12.1	27	31.06	8.21	7.1	0.29	0.007	0.069	0.366	0.011	2.2	2.45	1.53	0.604	0.027	1.37
18FA_12.2	27	31.06	8.21	7.1	0.29	0.007	0.069	0.366	0.011	2.2	2.45	1.53	0.604	0.027	1.37
18FA_12.3	27	31.06	8.21	7.1	0.29	0.007	0.069	0.366	0.011	2.2	2.45	1.53	0.604	0.027	1.37
18FA_12.4	27	31.06	8.21	7.1	0.29	0.007	0.069	0.366	0.011	2.2	2.45	1.53	0.604	0.027	1.37
18FA_12.5	27	31.06	8.21	7.1	0.29	0.007	0.069	0.366	0.011	2.2	2.45	1.53	0.604	0.027	1.37
18FA_13.1	27.2	32.42	8.05	7	0.229	0.008	0.063	0.3	0.017	2	2.29	1.35	0.569	0.033	1.53
18FA_13.2	27.2	32.42	8.05	7	0.229	0.008	0.063	0.3	0.017	2	2.29	1.35	0.569	0.033	1.53
18FA_13.3	27.2	32.42	8.05	7	0.229	0.008	0.063	0.3	0.017	2	2.29	1.35	0.569	0.033	1.53
18FA_13.4	27.2	32.42	8.05	7	0.229	0.008	0.063	0.3	0.017	2	2.29	1.35	0.569	0.033	1.53
18FA_13.5	27.2	32.42	8.05	7	0.229	0.008	0.063	0.3	0.017	2	2.29	1.35	0.569	0.033	1.53
18FA_14.1	27.3	32.3	7.98	7.1	0.176	0.008	0.053	0.237	0.018	2.4	2.03	1.52	0.559	0.035	1.44
18FA_14.2	27.3	32.3	7.98	7.1	0.176	0.008	0.053	0.237	0.018	2.4	2.03	1.52	0.559	0.035	1.44
18FA_14.3	27.3	32.3	7.98	7.1	0.176	0.008	0.053	0.237	0.018	2.4	2.03	1.52	0.559	0.035	1.44
18FA_14.4	27.3	32.3	7.98	7.1	0.176	0.008	0.053	0.237	0.018	2.4	2.03	1.52	0.559	0.035	1.44
18FA_14.5	27.3	32.3	7.98	7.1	0.176	0.008	0.053	0.237	0.018	2.4	2.03	1.52	0.559	0.035	1.44
18FA_15.1	26.8	33.63	7.97	6.5	0.157	0.007	0.025	0.189	0.021	1.8	2.21	1.48	0.722	0.038	1.31
18FA_15.2	26.8	33.63	7.97	6.5	0.157	0.007	0.025	0.189	0.021	1.8	2.21	1.48	0.722	0.038	1.31
18FA_15.3	26.8	33.63	7.97	6.5	0.157	0.007	0.025	0.189	0.021	1.8	2.21	1.48	0.722	0.038	1.31
18FA_15.4	26.8	33.63	7.97	6.5	0.157	0.007	0.025	0.189	0.021	1.8	2.21	1.48	0.722	0.038	1.31
18FA_15.5	26.8	33.63	7.97	6.5	0.157	0.007	0.025	0.189	0.021	1.8	2.21	1.48	0.722	0.038	1.31
18FA_16.1	27.1	22.16	8.08	6.8	0.124	0.01	0.04	0.174	0.027	3.8	2.44	1.21	0.356	0.05	1.26
18FA_16.2	27.1	22.16	8.08	6.8	0.124	0.01	0.04	0.174	0.027	3.8	2.44	1.21	0.356	0.05	1.26
18FA_16.3	27.1	22.16	8.08	6.8	0.124	0.01	0.04	0.174	0.027	3.8	2.44	1.21	0.356	0.05	1.26
18FA_16.4	27.1	22.16	8.08	6.8	0.124	0.01	0.04	0.174	0.027	3.8	2.44	1.21	0.356	0.05	1.26
18FA_16.5	27.1	22.16	8.08	6.8	0.124	0.01	0.04	0.174	0.027	3.8	2.44	1.21	0.356	0.05	1.26
18WI_01.1	18.6	24.4	7.99	6.2	0.559	0.013	0.15	0.722	0.012	7.2	3.12	2.02	1.159	0.029	3.89
18WI_01.2	18.6	24.4	7.99	6.2	0.559	0.013	0.15	0.722	0.012	7.2	3.12	2.02	1.159	0.029	3.89
18WI_01.3	18.6	24.4	7.99	6.2	0.559	0.013	0.15	0.722	0.012	7.2	3.12	2.02	1.159	0.029	3.89
18WI_01.4	18.6	24.4	7.99	6.2	0.559	0.013	0.15	0.722	0.012	7.2	3.12	2.02	1.159	0.029	3.89
18WI_01.5	18.6	24.4	7.99	6.2	0.559	0.013	0.15	0.722	0.012	7.2	3.12	2.02	1.159	0.029	3.89
18WI_02.1	18.5	23.9	7.99	6.2	0.473	0.007	0.117	0.597	0.014	7.1	3.05	2.05	0.895	0.025	3.81
18WI_02.2	18.5	23.9	7.99	6.2	0.473	0.007	0.117	0.597	0.014	7.1	3.05	2.05	0.895	0.025	3.81
18WI_02.3	18.5	23.9	7.99	6.2	0.473	0.007	0.117	0.597	0.014	7.1	3.05	2.05	0.895	0.025	3.81
18WI_02.4	18.5	23.9	7.99	6.2	0.473	0.007	0.117	0.597	0.014	7.1	3.05	2.05	0.895	0.025	3.81
18WI_02.5	18.5	23.9	7.99	6.2	0.473	0.007	0.117	0.597	0.014	7.1	3.05	2.05	0.895	0.025	3.81
18WI_03.1	18.6	25.3	8.04	6.2	0.391	0.009	0.111	0.511	0.016	7.2	3.1	2.01	0.792	0.029	3.65
18WI_03.2	18.6	25.3	8.04	6.2	0.391	0.009	0.111	0.511	0.016	7.2	3.1	2.01	0.792	0.029	3.65
18WI_03.3	18.6	25.3	8.04	6.2	0.391	0.009	0.111	0.511	0.016	7.2	3.1	2.01	0.792	0.029	3.65
18WI_03.4	18.6	25.3	8.04	6.2	0.391	0.009	0.111	0.511	0.016	7.2	3.1	2.01	0.792	0.029	3.65
18WI_03.5	18.6	25.3	8.04	6.2	0.391	0.009	0.111	0.511	0.016	7.2	3.1	2.01	0.792	0.029	3.65
18WI_04.1	18.6	25.4	7.83	6.1	0.374	0.009	0.109	0.492	0.016	7.1	3.1	1.91	0.871	0.035	3.34
18WI_04.2	18.6	25.4	7.83	6.1	0.374	0.009	0.109	0.492	0.016	7.1	3.1	1.91	0.871	0.035	3.34
18WI_04.3	18.6	25.4	7.83	6.1	0.374	0.009	0.109	0.492	0.016	7.1	3.1	1.91	0.871	0.035	3.34
18WI_04.4	18.6	25.4	7.83	6.1	0.374	0.009	0.109	0.492	0.016	7.1	3.1	1.91	0.871	0.035	3.34
18WI_04.5	18.6	25.4	7.83	6.1	0.374	0.009	0.109	0.492	0.016	7.1	3.1	1.91	0.871	0.035	3.34
18WI_05.1	18.7	26	8.1	6.3	0.342	0.009	0.095	0.446	0.018	5.3	2.86	1.93	0.662	0.039	3.44
18WI_05.2	18.7	26	8.1	6.3	0.342	0.009	0.095	0.446	0.018	5.3	2.86	1.93	0.662	0.039	3.44
18WI_05.3	18.7	26	8.1	6.3	0.342	0.009	0.095	0.446	0.018	5.3	2.86	1.93	0.662	0.039	3.44
18WI_05.4	18.7	26	8.1	6.3	0.342	0.009	0.095	0.446	0.018	5.3	2.86	1.93	0.662	0.039	3.44
18WI_05.5	18.7	26	8.1	6.3	0.342	0.009	0.095	0.446	0.018	5.3	2.86	1.93	0.662	0.039	3.44
18WI_06.1	18.6	26.7	8.15	6.1	0.289	0.008	0.086	0.383	0.016	5	2.77	1.62	0.663	0.038	2.21
18WI_06.2	18.6	26.7	8.15	6.1	0.289	0.008	0.086	0.383	0.016	5	2.77	1.62	0.663	0.038	2.21
18WI_06.3	18.6	26.7	8.15	6.1	0.289	0.008	0.086	0.383	0.016	5	2.77	1.62	0.663	0.038	2.21
18WI_06.4	18.6	26.7	8.15	6.1	0.289	0.008	0.086	0.383	0.016	5	2.77	1.62	0.663	0.038	2.21
18WI_06.5	18.6	26.7	8.15	6.1	0.289	0.008	0.086	0.383	0.016	5	2.77	1.62	0.663	0.038	2.21
18WI_07.1	18.8	27.9	8.2	7.1	0.328	0.008	0.074	0.41	0.013	4.9	2.4	1.66	0.642	0.03	1.97
18WI_07.2	18.8	27.9	8.2	7.1	0.328	0.008	0.074	0.41	0.013	4.9	2.4	1.66	0.642	0.03	1.97
18WI_07.3	18.8	27.9	8.2	7.1	0.328	0.008	0.074	0.41	0.013	4.9	2.4	1.66	0.642	0.03	1.97
18WI_07.4	18.8	27.9	8.2	7.1	0.328	0.008	0.074	0.41	0.013	4.9	2.4	1.66	0.642	0.03	1.97
18WI_07.5	18.8	27.9	8.2	7.1	0.328	0.008	0.074	0.41	0.013	4.9	2.4	1.66	0.642	0.03	1.97
18WI_09.1	19.6	28.7	8.41	6.2	0.373	0.006	0.092	0.471	0.012	4.9	2.44	1.65	0.546	0.022	2.07
18WI_09.2	19.6	28.7	8.41	6.2	0.373	0.006	0.092	0.471	0.012	4.9	2.44	1.65	0.546	0.022	2.07
18WI_09.3	19.6	28.7	8.41	6.2	0.373	0.006	0.092	0.471	0.012	4.9	2.44	1.65	0.546	0.022	2.07
18WI_09.4	19.6	28.7	8.41	6.2	0.373	0.006	0.092	0.471	0.012	4.9	2.44	1.65	0.546	0.022	2.07
18WI_09.5	19.6	28.7	8.41	6.2	0.373	0.006	0.092	0.471	0.012	4.9	2.44	1.65	0.546	0.022	2.07
18WI_10.1	20.5	27.8	8.36	7.2	0.366	0.007	0.08	0.453	0.012	4.7	2.1	1.49	0.552	0.027	1.8
18WI_10.2	20.5	27.8	8.36	7.2	0.366	0.007	0.08	0.453	0.012	4.7	2.1	1.49	0.552	0.027	1.8
18WI_10.3	20.5	27.8	8.36	7.2	0.366	0.007	0.08	0.453	0.012	4.7	2.1	1.49	0.552	0.027	1.8
18WI_10.4	20.5	27.8	8.36	7.2	0.366	0.007	0.08	0.453	0.012	4.7	2.1	1.49	0.552	0.027	1.8
18WI_10.5	20.5	27.8	8.36	7.2	0.366	0.007	0.08	0.453	0.012	4.7	2.1	1.49	0.552	0.027	1.8
18WI_11.1	19.4	29.5	8.4	7.2	0.294	0.006	0.108	0.408	0.014	3.8	2.3	1.3	0.517	0.034	1.65
18WI_11.2	19.4	29.5	8.4	7.2	0.294	0.006	0.108	0.408	0.014	3.8	2.3	1.3	0.517	0.034	1.65
18WI_11.3	19.4	29.5	8.4	7.2	0.294	0.006	0.108	0.408	0.014	3.8	2.3	1.3	0.517	0.034	1.65
18WI_11.4	19.4	29.5	8.4	7.2	0.294	0.006	0.108	0.408	0.014	3.8	2.3	1.3	0.517	0.034	1.65
18WI_11.5	19.4	29.5	8.4	7.2	0.294	0.006	0.108	0.408	0.014	3.8	2.3	1.3	0.517	0.034	1.65
18WI_12.1	19.7	29.9	8.37	7.1	0.315	0.005	0.082	0.402	0.015	3.2	2.1	1.18	0.535	0.03	1.58
18WI_12.2	19.7	29.9	8.37	7.1	0.315	0.005	0.082	0.402	0.015	3.2	2.1	1.18	0.535	0.03	1.58
18WI_12.3	19.7	29.9	8.37	7.1	0.315	0.005	0.082	0.402	0.015	3.2	2.1	1.18	0.535	0.03	1.58
18WI_12.4	19.7	29.9	8.37	7.1	0.315	0.005	0.082	0.402	0.015	3.2	2.1	1.18	0.535	0.03	1.58
18WI_12.5	19.7	29.9	8.37	7.1	0.315	0.005	0.082	0.402	0.015	3.2	2.1	1.18	0.535	0.03	1.58
18WI_13.1	19	29.5	8.16	7.2	0.287	0.005	0.088	0.38	0.015	3.4	2.13	0.97	0.493	0.029	1.23
18WI_13.2	19	29.5	8.16	7.2	0.287	0.005	0.088	0.38	0.015	3.4	2.13	0.97	0.493	0.029	1.23
18WI_13.3	19	29.5	8.16	7.2	0.287	0.005	0.088	0.38	0.015	3.4	2.13	0.97	0.493	0.029	1.23
18WI_13.4	19	29.5	8.16	7.2	0.287	0.005	0.088	0.38	0.015	3.4	2.13	0.97	0.493	0.029	1.23
18WI_13.5	19	29.5	8.16	7.2	0.287	0.005	0.088	0.38	0.015	3.4	2.13	0.97	0.493	0.029	1.23
18WI_14.1	19.7	30.1	8.74	7.2	0.184	0.006	0.178	0.368	0.02	4.8	2.06	0.82	0.552	0.039	1.34
18WI_14.2	19.7	30.1	8.74	7.2	0.184	0.006	0.178	0.368	0.02	4.8	2.06	0.82	0.552	0.039	1.34
18WI_14.3	19.7	30.1	8.74	7.2	0.184	0.006	0.178	0.368	0.02	4.8	2.06	0.82	0.552	0.039	1.34
18WI_14.4	19.7	30.1	8.74	7.2	0.184	0.006	0.178	0.368	0.02	4.8	2.06	0.82	0.552	0.039	1.34
18WI_14.5	19.7	30.1	8.74	7.2	0.184	0.006	0.178	0.368	0.02	4.8	2.06	0.82	0.552	0.039	1.34
18WI_15.1	18.9	29.6	8.27	6.8	0.184	0.007	0.152	0.343	0.016	3.6	2.04	0.93	0.486	0.035	1.13
18WI_15.2	18.9	29.6	8.27	6.8	0.184	0.007	0.152	0.343	0.016	3.6	2.04	0.93	0.486	0.035	1.13
18WI_15.3	18.9	29.6	8.27	6.8	0.184	0.007	0.152	0.343	0.016	3.6	2.04	0.93	0.486	0.035	1.13
18WI_15.4	18.9	29.6	8.27	6.8	0.184	0.007	0.152	0.343	0.016	3.6	2.04	0.93	0.486	0.035	1.13
18WI_15.5	18.9	29.6	8.27	6.8	0.184	0.007	0.152	0.343	0.016	3.6	2.04	0.93	0.486	0.035	1.13
18WI_16.1	18.8	30.4	8.27	6.4	0.208	0.008	0.178	0.394	0.016	4	2.11	0.85	0.573	0.034	1.19
18WI_16.2	18.8	30.4	8.27	6.4	0.208	0.008	0.178	0.394	0.016	4	2.11	0.85	0.573	0.034	1.19
18WI_16.3	18.8	30.4	8.27	6.4	0.208	0.008	0.178	0.394	0.016	4	2.11	0.85	0.573	0.034	1.19
18WI_16.4	18.8	30.4	8.27	6.4	0.208	0.008	0.178	0.394	0.016	4	2.11	0.85	0.573	0.034	1.19
18WI_16.5	18.8	30.4	8.27	6.4	0.208	0.008	0.178	0.394	0.016	4	2.11	0.85	0.573	0.034	1.19
20SP_01.1	21.7	21.82	7.96	7.1	0.94	0.044	0.02	1.004	0.022	1.3	3.74	2.73	1.756	0.05	13.4
20SP_01.2	21.7	21.82	7.96	7.1	0.94	0.044	0.02	1.004	0.022	1.3	3.74	2.73	1.756	0.05	13.4
20SP_01.3	21.7	21.82	7.96	7.1	0.94	0.044	0.02	1.004	0.022	1.3	3.74	2.73	1.756	0.05	13.4
20SP_01.4	21.7	21.82	7.96	7.1	0.94	0.044	0.02	1.004	0.022	1.3	3.74	2.73	1.756	0.05	13.4
20SP_01.5	21.7	21.82	7.96	7.1	0.94	0.044	0.02	1.004	0.022	1.3	3.74	2.73	1.756	0.05	13.4
20SP_02.1	21.8	22.28	7.98	7.2	0.76	0.036	0.102	0.898	0.018	1.5	3.17	2.41	1.361	0.035	8.66
20SP_02.2	21.8	22.28	7.98	7.2	0.76	0.036	0.102	0.898	0.018	1.5	3.17	2.41	1.361	0.035	8.66
20SP_02.3	21.8	22.28	7.98	7.2	0.76	0.036	0.102	0.898	0.018	1.5	3.17	2.41	1.361	0.035	8.66
20SP_02.4	21.8	22.28	7.98	7.2	0.76	0.036	0.102	0.898	0.018	1.5	3.17	2.41	1.361	0.035	8.66
20SP_02.5	21.8	22.28	7.98	7.2	0.76	0.036	0.102	0.898	0.018	1.5	3.17	2.41	1.361	0.035	8.66
20SP_03.1	21.8	23.43	8.01	7.4	0.57	0.023	0.016	0.609	0.016	0.8	2.91	2.86	0.955	0.032	6.19
20SP_03.2	21.8	23.43	8.01	7.4	0.57	0.023	0.016	0.609	0.016	0.8	2.91	2.86	0.955	0.032	6.19
20SP_03.3	21.8	23.43	8.01	7.4	0.57	0.023	0.016	0.609	0.016	0.8	2.91	2.86	0.955	0.032	6.19
20SP_03.4	21.8	23.43	8.01	7.4	0.57	0.023	0.016	0.609	0.016	0.8	2.91	2.86	0.955	0.032	6.19
20SP_03.5	21.8	23.43	8.01	7.4	0.57	0.023	0.016	0.609	0.016	0.8	2.91	2.86	0.955	0.032	6.19
20SP_04.1	21.6	24.94	8.08	7.5	0.23	0.018	0.023	0.271	0.014	2.1	2.75	2.3	0.481	0.031	1.94
20SP_04.2	21.6	24.94	8.08	7.5	0.23	0.018	0.023	0.271	0.014	2.1	2.75	2.3	0.481	0.031	1.94
20SP_04.3	21.6	24.94	8.08	7.5	0.23	0.018	0.023	0.271	0.014	2.1	2.75	2.3	0.481	0.031	1.94
20SP_04.4	21.6	24.94	8.08	7.5	0.23	0.018	0.023	0.271	0.014	2.1	2.75	2.3	0.481	0.031	1.94
20SP_04.5	21.6	24.94	8.08	7.5	0.23	0.018	0.023	0.271	0.014	2.1	2.75	2.3	0.481	0.031	1.94
20SP_05.1	21.5	25.81	8.04	7.6	0.29	0.032	0.026	0.348	0.013	1.7	2.79	2.45	0.602	0.027	2.46
20SP_05.2	21.5	25.81	8.04	7.6	0.29	0.032	0.026	0.348	0.013	1.7	2.79	2.45	0.602	0.027	2.46
20SP_05.3	21.5	25.81	8.04	7.6	0.29	0.032	0.026	0.348	0.013	1.7	2.79	2.45	0.602	0.027	2.46
20SP_05.4	21.5	25.81	8.04	7.6	0.29	0.032	0.026	0.348	0.013	1.7	2.79	2.45	0.602	0.027	2.46
20SP_05.5	21.5	25.81	8.04	7.6	0.29	0.032	0.026	0.348	0.013	1.7	2.79	2.45	0.602	0.027	2.46
20SP_06.1	21	28.66	8.11	7.5	0.35	0.037	0.041	0.428	0.011	1.7	2.39	2.12	0.79	0.026	2.22
20SP_06.2	21	28.66	8.11	7.5	0.35	0.037	0.041	0.428	0.011	1.7	2.39	2.12	0.79	0.026	2.22
20SP_06.3	21	28.66	8.11	7.5	0.35	0.037	0.041	0.428	0.011	1.7	2.39	2.12	0.79	0.026	2.22
20SP_06.4	21	28.66	8.11	7.5	0.35	0.037	0.041	0.428	0.011	1.7	2.39	2.12	0.79	0.026	2.22
20SP_06.5	21	28.66	8.11	7.5	0.35	0.037	0.041	0.428	0.011	1.7	2.39	2.12	0.79	0.026	2.22
20SP_07.1	20.8	29.34	8.06	7.5	0.33	0.035	0.055	0.42	0.01	1.7	2.28	2.1	0.65	0.023	1.96
20SP_07.2	20.8	29.34	8.06	7.5	0.33	0.035	0.055	0.42	0.01	1.7	2.28	2.1	0.65	0.023	1.96
20SP_07.3	20.8	29.34	8.06	7.5	0.33	0.035	0.055	0.42	0.01	1.7	2.28	2.1	0.65	0.023	1.96
20SP_07.4	20.8	29.34	8.06	7.5	0.33	0.035	0.055	0.42	0.01	1.7	2.28	2.1	0.65	0.023	1.96
20SP_07.5	20.8	29.34	8.06	7.5	0.33	0.035	0.055	0.42	0.01	1.7	2.28	2.1	0.65	0.023	1.96
20SP_08.1	20.4	27.92	8.24	7.5	0.35	0.023	0.032	0.405	0.011	0.9	2.43	2.06	0.521	0.021	2.04
20SP_08.2	20.4	27.92	8.24	7.5	0.35	0.023	0.032	0.405	0.011	0.9	2.43	2.06	0.521	0.021	2.04
20SP_08.3	20.4	27.92	8.24	7.5	0.35	0.023	0.032	0.405	0.011	0.9	2.43	2.06	0.521	0.021	2.04
20SP_08.4	20.4	27.92	8.24	7.5	0.35	0.023	0.032	0.405	0.011	0.9	2.43	2.06	0.521	0.021	2.04
20SP_08.5	20.4	27.92	8.24	7.5	0.35	0.023	0.032	0.405	0.011	0.9	2.43	2.06	0.521	0.021	2.04
20SP_09.1	21.1	30.73	8.18	7.5	0.52	0.019	0.053	0.592	0.007	1.1	2.26	2.13	0.716	0.014	1.96
20SP_09.2	21.1	30.73	8.18	7.5	0.52	0.019	0.053	0.592	0.007	1.1	2.26	2.13	0.716	0.014	1.96
20SP_09.3	21.1	30.73	8.18	7.5	0.52	0.019	0.053	0.592	0.007	1.1	2.26	2.13	0.716	0.014	1.96
20SP_09.4	21.1	30.73	8.18	7.5	0.52	0.019	0.053	0.592	0.007	1.1	2.26	2.13	0.716	0.014	1.96
20SP_09.5	21.1	30.73	8.18	7.5	0.52	0.019	0.053	0.592	0.007	1.1	2.26	2.13	0.716	0.014	1.96
20SP_10.1	20.6	28.29	8.06	7.5	0.34	0.022	0.04	0.402	0.008	1.1	2.29	2.13	0.51	0.016	1.52
20SP_10.2	20.6	28.29	8.06	7.5	0.34	0.022	0.04	0.402	0.008	1.1	2.29	2.13	0.51	0.016	1.52
20SP_10.3	20.6	28.29	8.06	7.5	0.34	0.022	0.04	0.402	0.008	1.1	2.29	2.13	0.51	0.016	1.52
20SP_10.4	20.6	28.29	8.06	7.5	0.34	0.022	0.04	0.402	0.008	1.1	2.29	2.13	0.51	0.016	1.52
20SP_10.5	20.6	28.29	8.06	7.5	0.34	0.022	0.04	0.402	0.008	1.1	2.29	2.13	0.51	0.016	1.52
20SP_11.1	20.6	30.86	8.06	7.6	0.33	0.042	0.064	0.436	0.007	2.1	1.97	1.98	0.526	0.018	1.34
20SP_11.2	20.6	30.86	8.06	7.6	0.33	0.042	0.064	0.436	0.007	2.1	1.97	1.98	0.526	0.018	1.34
20SP_11.3	20.6	30.86	8.06	7.6	0.33	0.042	0.064	0.436	0.007	2.1	1.97	1.98	0.526	0.018	1.34
20SP_11.4	20.6	30.86	8.06	7.6	0.33	0.042	0.064	0.436	0.007	2.1	1.97	1.98	0.526	0.018	1.34
20SP_11.5	20.6	30.86	8.06	7.6	0.33	0.042	0.064	0.436	0.007	2.1	1.97	1.98	0.526	0.018	1.34
20SP_12.1	21.6	31.84	8.13	7.3	0.63	0.023	0.048	0.701	0.007	1.3	1.87	1.31	0.99	0.019	1.43
20SP_12.2	21.6	31.84	8.13	7.3	0.63	0.023	0.048	0.701	0.007	1.3	1.87	1.31	0.99	0.019	1.43
20SP_12.3	21.6	31.84	8.13	7.3	0.63	0.023	0.048	0.701	0.007	1.3	1.87	1.31	0.99	0.019	1.43
20SP_12.4	21.6	31.84	8.13	7.3	0.63	0.023	0.048	0.701	0.007	1.3	1.87	1.31	0.99	0.019	1.43
20SP_12.5	21.6	31.84	8.13	7.3	0.63	0.023	0.048	0.701	0.007	1.3	1.87	1.31	0.99	0.019	1.43
20SP_13.1	20.6	32.61	8.02	7.5	0.35	0.021	0.041	0.412	0.007	2.8	1.91	1.26	0.586	0.015	0.81
20SP_13.2	20.6	32.61	8.02	7.5	0.35	0.021	0.041	0.412	0.007	2.8	1.91	1.26	0.586	0.015	0.81
20SP_13.3	20.6	32.61	8.02	7.5	0.35	0.021	0.041	0.412	0.007	2.8	1.91	1.26	0.586	0.015	0.81
20SP_13.4	20.6	32.61	8.02	7.5	0.35	0.021	0.041	0.412	0.007	2.8	1.91	1.26	0.586	0.015	0.81
20SP_13.5	20.6	32.61	8.02	7.5	0.35	0.021	0.041	0.412	0.007	2.8	1.91	1.26	0.586	0.015	0.81
20SP_14.1	21.4	31.88	7.99	7.3	0.377	0.019	0.053	0.449	0.006	3.3	2.02	1.34	0.644	0.014	0.8
20SP_14.2	21.4	31.88	7.99	7.3	0.377	0.019	0.053	0.449	0.006	3.3	2.02	1.34	0.644	0.014	0.8
20SP_14.3	21.4	31.88	7.99	7.3	0.377	0.019	0.053	0.449	0.006	3.3	2.02	1.34	0.644	0.014	0.8
20SP_14.4	21.4	31.88	7.99	7.3	0.377	0.019	0.053	0.449	0.006	3.3	2.02	1.34	0.644	0.014	0.8
20SP_14.5	21.4	31.88	7.99	7.3	0.377	0.019	0.053	0.449	0.006	3.3	2.02	1.34	0.644	0.014	0.8
20SP_15.1	21.6	32.28	8.12	7.4	0.33	0.02	0.055	0.405	0.005	3	1.91	1.27	0.63	0.013	0.57
20SP_15.2	21.6	32.28	8.12	7.4	0.33	0.02	0.055	0.405	0.005	3	1.91	1.27	0.63	0.013	0.57
20SP_15.3	21.6	32.28	8.12	7.4	0.33	0.02	0.055	0.405	0.005	3	1.91	1.27	0.63	0.013	0.57
20SP_15.4	21.6	32.28	8.12	7.4	0.33	0.02	0.055	0.405	0.005	3	1.91	1.27	0.63	0.013	0.57
20SP_15.5	21.6	32.28	8.12	7.4	0.33	0.02	0.055	0.405	0.005	3	1.91	1.27	0.63	0.013	0.57
20SP_16.1	21.8	32.36	8.11	7.5	0.312	0.014	0.049	0.375	0.006	3.4	1.73	1.3	0.57	0.012	0.65
20SP_16.2	21.8	32.36	8.11	7.5	0.312	0.014	0.049	0.375	0.006	3.4	1.73	1.3	0.57	0.012	0.65
20SP_16.3	21.8	32.36	8.11	7.5	0.312	0.014	0.049	0.375	0.006	3.4	1.73	1.3	0.57	0.012	0.65
20SP_16.4	21.8	32.36	8.11	7.5	0.312	0.014	0.049	0.375	0.006	3.4	1.73	1.3	0.57	0.012	0.65
20SP_16.5	21.8	32.36	8.11	7.5	0.312	0.014	0.049	0.375	0.006	3.4	1.73	1.3	0.57	0.012	0.65
20SU_01.1	32.1	18.81	7.78	5.4	0.683	0.039	0.119	0.841	0.027	1.4	4.32	2.81	1.127	0.054	14.18
20SU_01.2	32.1	18.81	7.78	5.4	0.683	0.039	0.119	0.841	0.027	1.4	4.32	2.81	1.127	0.054	14.18
20SU_01.3	32.1	18.81	7.78	5.4	0.683	0.039	0.119	0.841	0.027	1.4	4.32	2.81	1.127	0.054	14.18
20SU_01.4	32.1	18.81	7.78	5.4	0.683	0.039	0.119	0.841	0.027	1.4	4.32	2.81	1.127	0.054	14.18
20SU_01.5	32.1	18.81	7.78	5.4	0.683	0.039	0.119	0.841	0.027	1.4	4.32	2.81	1.127	0.054	14.18
20SU_02.1	32	18.92	7.75	5.1	0.361	0.025	0.078	0.464	0.022	2.7	4.41	2.78	0.557	0.041	6.31
20SU_02.2	32	18.92	7.75	5.1	0.361	0.025	0.078	0.464	0.022	2.7	4.41	2.78	0.557	0.041	6.31
20SU_02.3	32	18.92	7.75	5.1	0.361	0.025	0.078	0.464	0.022	2.7	4.41	2.78	0.557	0.041	6.31
20SU_02.4	32	18.92	7.75	5.1	0.361	0.025	0.078	0.464	0.022	2.7	4.41	2.78	0.557	0.041	6.31
20SU_02.5	32	18.92	7.75	5.1	0.361	0.025	0.078	0.464	0.022	2.7	4.41	2.78	0.557	0.041	6.31
20SU_03.1	32.2	19.12	7.8	5.6	0.381	0.025	0.076	0.482	0.018	4.1	4.18	2.32	0.531	0.032	4.47
20SU_03.2	32.2	19.12	7.8	5.6	0.381	0.025	0.076	0.482	0.018	4.1	4.18	2.32	0.531	0.032	4.47
20SU_03.3	32.2	19.12	7.8	5.6	0.381	0.025	0.076	0.482	0.018	4.1	4.18	2.32	0.531	0.032	4.47
20SU_03.4	32.2	19.12	7.8	5.6	0.381	0.025	0.076	0.482	0.018	4.1	4.18	2.32	0.531	0.032	4.47
20SU_03.5	32.2	19.12	7.8	5.6	0.381	0.025	0.076	0.482	0.018	4.1	4.18	2.32	0.531	0.032	4.47
20SU_04.1	32.2	20.82	7.86	5.7	0.382	0.026	0.071	0.479	0.017	4.1	3.13	2.52	0.585	0.04	4.56
20SU_04.2	32.2	20.82	7.86	5.7	0.382	0.026	0.071	0.479	0.017	4.1	3.13	2.52	0.585	0.04	4.56
20SU_04.3	32.2	20.82	7.86	5.7	0.382	0.026	0.071	0.479	0.017	4.1	3.13	2.52	0.585	0.04	4.56
20SU_04.4	32.2	20.82	7.86	5.7	0.382	0.026	0.071	0.479	0.017	4.1	3.13	2.52	0.585	0.04	4.56
20SU_04.5	32.2	20.82	7.86	5.7	0.382	0.026	0.071	0.479	0.017	4.1	3.13	2.52	0.585	0.04	4.56
20SU_05.1	31.8	21.74	7.84	5.6	0.375	0.025	0.071	0.471	0.016	2.7	3.11	2.33	0.584	0.039	3.9
20SU_05.2	31.8	21.74	7.84	5.6	0.375	0.025	0.071	0.471	0.016	2.7	3.11	2.33	0.584	0.039	3.9
20SU_05.3	31.8	21.74	7.84	5.6	0.375	0.025	0.071	0.471	0.016	2.7	3.11	2.33	0.584	0.039	3.9
20SU_05.4	31.8	21.74	7.84	5.6	0.375	0.025	0.071	0.471	0.016	2.7	3.11	2.33	0.584	0.039	3.9
20SU_05.5	31.8	21.74	7.84	5.6	0.375	0.025	0.071	0.471	0.016	2.7	3.11	2.33	0.584	0.039	3.9
20SU_06.1	31.4	23.17	7.81	5	0.406	0.038	0.072	0.516	0.012	4.8	3.11	2.25	0.69	0.027	3.1
20SU_06.2	31.4	23.17	7.81	5	0.406	0.038	0.072	0.516	0.012	4.8	3.11	2.25	0.69	0.027	3.1
20SU_06.3	31.4	23.17	7.81	5	0.406	0.038	0.072	0.516	0.012	4.8	3.11	2.25	0.69	0.027	3.1
20SU_06.4	31.4	23.17	7.81	5	0.406	0.038	0.072	0.516	0.012	4.8	3.11	2.25	0.69	0.027	3.1
20SU_06.5	31.4	23.17	7.81	5	0.406	0.038	0.072	0.516	0.012	4.8	3.11	2.25	0.69	0.027	3.1
20SU_07.1	31.4	23.54	7.86	4.9	0.401	0.028	0.077	0.506	0.009	3	3.13	2.41	0.698	0.018	2.44
20SU_07.2	31.4	23.54	7.86	4.9	0.401	0.028	0.077	0.506	0.009	3	3.13	2.41	0.698	0.018	2.44
20SU_07.3	31.4	23.54	7.86	4.9	0.401	0.028	0.077	0.506	0.009	3	3.13	2.41	0.698	0.018	2.44
20SU_07.4	31.4	23.54	7.86	4.9	0.401	0.028	0.077	0.506	0.009	3	3.13	2.41	0.698	0.018	2.44
20SU_07.5	31.4	23.54	7.86	4.9	0.401	0.028	0.077	0.506	0.009	3	3.13	2.41	0.698	0.018	2.44
20SU_08.1	31.6	24.28	7.95	6.1	0.419	0.028	0.085	0.532	0.009	4.8	2.88	2.09	0.75	0.02	2.22
20SU_08.2	31.6	24.28	7.95	6.1	0.419	0.028	0.085	0.532	0.009	4.8	2.88	2.09	0.75	0.02	2.22
20SU_08.3	31.6	24.28	7.95	6.1	0.419	0.028	0.085	0.532	0.009	4.8	2.88	2.09	0.75	0.02	2.22
20SU_08.4	31.6	24.28	7.95	6.1	0.419	0.028	0.085	0.532	0.009	4.8	2.88	2.09	0.75	0.02	2.22
20SU_08.5	31.6	24.28	7.95	6.1	0.419	0.028	0.085	0.532	0.009	4.8	2.88	2.09	0.75	0.02	2.22
20SU_09.1	31.1	24.16	7.99	6.4	0.203	0.025	0.034	0.262	0.01	3.2	2.73	2.43	0.38	0.024	1.41
20SU_09.2	31.1	24.16	7.99	6.4	0.203	0.025	0.034	0.262	0.01	3.2	2.73	2.43	0.38	0.024	1.41
20SU_09.3	31.1	24.16	7.99	6.4	0.203	0.025	0.034	0.262	0.01	3.2	2.73	2.43	0.38	0.024	1.41
20SU_09.4	31.1	24.16	7.99	6.4	0.203	0.025	0.034	0.262	0.01	3.2	2.73	2.43	0.38	0.024	1.41
20SU_09.5	31.1	24.16	7.99	6.4	0.203	0.025	0.034	0.262	0.01	3.2	2.73	2.43	0.38	0.024	1.41
20SU_10.1	31.1	24.21	7.88	5.3	0.388	0.036	0.071	0.495	0.008	2.9	2.23	2.28	0.595	0.014	2.01
20SU_10.2	31.1	24.21	7.88	5.3	0.388	0.036	0.071	0.495	0.008	2.9	2.23	2.28	0.595	0.014	2.01
20SU_10.3	31.1	24.21	7.88	5.3	0.388	0.036	0.071	0.495	0.008	2.9	2.23	2.28	0.595	0.014	2.01
20SU_10.4	31.1	24.21	7.88	5.3	0.388	0.036	0.071	0.495	0.008	2.9	2.23	2.28	0.595	0.014	2.01
20SU_10.5	31.1	24.21	7.88	5.3	0.388	0.036	0.071	0.495	0.008	2.9	2.23	2.28	0.595	0.014	2.01
20SU_11.1	32.1	27.38	8.03	6.8	0.112	0.018	0.021	0.151	0.007	5.9	2.16	1.68	0.238	0.016	0.39
20SU_11.2	32.1	27.38	8.03	6.8	0.112	0.018	0.021	0.151	0.007	5.9	2.16	1.68	0.238	0.016	0.39
20SU_11.3	32.1	27.38	8.03	6.8	0.112	0.018	0.021	0.151	0.007	5.9	2.16	1.68	0.238	0.016	0.39
20SU_11.4	32.1	27.38	8.03	6.8	0.112	0.018	0.021	0.151	0.007	5.9	2.16	1.68	0.238	0.016	0.39
20SU_11.5	32.1	27.38	8.03	6.8	0.112	0.018	0.021	0.151	0.007	5.9	2.16	1.68	0.238	0.016	0.39
20SU_12.1	31.3	27.35	7.96	6.2	0.118	0.026	0.021	0.165	0.007	8.2	1.99	1.66	0.296	0.016	0.43
20SU_12.2	31.3	27.35	7.96	6.2	0.118	0.026	0.021	0.165	0.007	8.2	1.99	1.66	0.296	0.016	0.43
20SU_12.3	31.3	27.35	7.96	6.2	0.118	0.026	0.021	0.165	0.007	8.2	1.99	1.66	0.296	0.016	0.43
20SU_12.4	31.3	27.35	7.96	6.2	0.118	0.026	0.021	0.165	0.007	8.2	1.99	1.66	0.296	0.016	0.43
20SU_12.5	31.3	27.35	7.96	6.2	0.118	0.026	0.021	0.165	0.007	8.2	1.99	1.66	0.296	0.016	0.43
20SU_13.1	32.3	28.28	8.08	6	0.135	0.02	0.022	0.177	0.007	3.8	1.87	1.49	0.341	0.016	0.41
20SU_13.2	32.3	28.28	8.08	6	0.135	0.02	0.022	0.177	0.007	3.8	1.87	1.49	0.341	0.016	0.41
20SU_13.3	32.3	28.28	8.08	6	0.135	0.02	0.022	0.177	0.007	3.8	1.87	1.49	0.341	0.016	0.41
20SU_13.4	32.3	28.28	8.08	6	0.135	0.02	0.022	0.177	0.007	3.8	1.87	1.49	0.341	0.016	0.41
20SU_13.5	32.3	28.28	8.08	6	0.135	0.02	0.022	0.177	0.007	3.8	1.87	1.49	0.341	0.016	0.41
20SU_14.1	31.6	27.71	7.96	6.8	0.231	0.011	0.038	0.28	0.006	3.6	1.82	1.31	0.441	0.012	0.49
20SU_14.2	31.6	27.71	7.96	6.8	0.231	0.011	0.038	0.28	0.006	3.6	1.82	1.31	0.441	0.012	0.49
20SU_14.3	31.6	27.71	7.96	6.8	0.231	0.011	0.038	0.28	0.006	3.6	1.82	1.31	0.441	0.012	0.49
20SU_14.4	31.6	27.71	7.96	6.8	0.231	0.011	0.038	0.28	0.006	3.6	1.82	1.31	0.441	0.012	0.49
20SU_14.5	31.6	27.71	7.96	6.8	0.231	0.011	0.038	0.28	0.006	3.6	1.82	1.31	0.441	0.012	0.49
20SU_15.1	31.6	28.61	7.95	6.7	0.101	0.012	0.016	0.129	0.006	7.5	1.93	1.4	0.2	0.012	0.24
20SU_15.2	31.6	28.61	7.95	6.7	0.101	0.012	0.016	0.129	0.006	7.5	1.93	1.4	0.2	0.012	0.24
20SU_15.3	31.6	28.61	7.95	6.7	0.101	0.012	0.016	0.129	0.006	7.5	1.93	1.4	0.2	0.012	0.24
20SU_15.4	31.6	28.61	7.95	6.7	0.101	0.012	0.016	0.129	0.006	7.5	1.93	1.4	0.2	0.012	0.24
20SU_15.5	31.6	28.61	7.95	6.7	0.101	0.012	0.016	0.129	0.006	7.5	1.93	1.4	0.2	0.012	0.24
20SU_16.1	31.7	27.72	8.02	6.8	0.138	0.012	0.035	0.185	0.005	3.9	1.82	1.31	0.394	0.013	0.27
20SU_16.2	31.7	27.72	8.02	6.8	0.138	0.012	0.035	0.185	0.005	3.9	1.82	1.31	0.394	0.013	0.27
20SU_16.3	31.7	27.72	8.02	6.8	0.138	0.012	0.035	0.185	0.005	3.9	1.82	1.31	0.394	0.013	0.27
20SU_16.4	31.7	27.72	8.02	6.8	0.138	0.012	0.035	0.185	0.005	3.9	1.82	1.31	0.394	0.013	0.27
20SU_16.5	31.7	27.72	8.02	6.8	0.138	0.012	0.035	0.185	0.005	3.9	1.82	1.31	0.394	0.013	0.27
20FA_01.1	21.94	24.47	8.11	7.1	0.256	0.009	0.061	0.326	0.03	2.1	4.77	2.75	0.565	0.081	5.98
20FA_01.2	21.94	24.47	8.11	7.1	0.256	0.009	0.061	0.326	0.03	2.1	4.77	2.75	0.565	0.081	5.98
20FA_01.3	21.94	24.47	8.11	7.1	0.256	0.009	0.061	0.326	0.03	2.1	4.77	2.75	0.565	0.081	5.98
20FA_01.4	21.94	24.47	8.11	7.1	0.256	0.009	0.061	0.326	0.03	2.1	4.77	2.75	0.565	0.081	5.98
20FA_01.5	21.94	24.47	8.11	7.1	0.256	0.009	0.061	0.326	0.03	2.1	4.77	2.75	0.565	0.081	5.98
20FA_02.1	22.14	23.66	8.18	7.3	0.286	0.008	0.062	0.356	0.029	3.5	4.99	2.81	0.55	0.074	6.45
20FA_02.2	22.14	23.66	8.18	7.3	0.286	0.008	0.062	0.356	0.029	3.5	4.99	2.81	0.55	0.074	6.45
20FA_02.3	22.14	23.66	8.18	7.3	0.286	0.008	0.062	0.356	0.029	3.5	4.99	2.81	0.55	0.074	6.45
20FA_02.4	22.14	23.66	8.18	7.3	0.286	0.008	0.062	0.356	0.029	3.5	4.99	2.81	0.55	0.074	6.45
20FA_02.5	22.14	23.66	8.18	7.3	0.286	0.008	0.062	0.356	0.029	3.5	4.99	2.81	0.55	0.074	6.45
20FA_03.1	22.53	24.42	8.2	7.3	0.234	0.008	0.058	0.3	0.019	4.6	6.19	2.47	0.592	0.039	3.13
20FA_03.2	22.53	24.42	8.2	7.3	0.234	0.008	0.058	0.3	0.019	4.6	6.19	2.47	0.592	0.039	3.13
20FA_03.3	22.53	24.42	8.2	7.3	0.234	0.008	0.058	0.3	0.019	4.6	6.19	2.47	0.592	0.039	3.13
20FA_03.4	22.53	24.42	8.2	7.3	0.234	0.008	0.058	0.3	0.019	4.6	6.19	2.47	0.592	0.039	3.13
20FA_03.5	22.53	24.42	8.2	7.3	0.234	0.008	0.058	0.3	0.019	4.6	6.19	2.47	0.592	0.039	3.13
20FA_04.1	22.16	25.36	8.22	7.3	0.291	0.009	0.052	0.352	0.023	5.7	5.51	2.3	0.559	0.048	4.14
20FA_04.2	22.16	25.36	8.22	7.3	0.291	0.009	0.052	0.352	0.023	5.7	5.51	2.3	0.559	0.048	4.14
20FA_04.3	22.16	25.36	8.22	7.3	0.291	0.009	0.052	0.352	0.023	5.7	5.51	2.3	0.559	0.048	4.14
20FA_04.4	22.16	25.36	8.22	7.3	0.291	0.009	0.052	0.352	0.023	5.7	5.51	2.3	0.559	0.048	4.14
20FA_04.5	22.16	25.36	8.22	7.3	0.291	0.009	0.052	0.352	0.023	5.7	5.51	2.3	0.559	0.048	4.14
20FA_05.1	21.97	26.41	8.26	7.3	0.271	0.008	0.055	0.334	0.014	6.2	5.16	2.62	0.526	0.026	2.72
20FA_05.2	21.97	26.41	8.26	7.3	0.271	0.008	0.055	0.334	0.014	6.2	5.16	2.62	0.526	0.026	2.72
20FA_05.3	21.97	26.41	8.26	7.3	0.271	0.008	0.055	0.334	0.014	6.2	5.16	2.62	0.526	0.026	2.72
20FA_05.4	21.97	26.41	8.26	7.3	0.271	0.008	0.055	0.334	0.014	6.2	5.16	2.62	0.526	0.026	2.72
20FA_05.5	21.97	26.41	8.26	7.3	0.271	0.008	0.055	0.334	0.014	6.2	5.16	2.62	0.526	0.026	2.72
20FA_06.1	21.96	28.47	8.29	7.3	0.263	0.008	0.061	0.332	0.015	3.1	5.41	2.05	0.511	0.038	2.27
20FA_06.2	21.96	28.47	8.29	7.3	0.263	0.008	0.061	0.332	0.015	3.1	5.41	2.05	0.511	0.038	2.27
20FA_06.3	21.96	28.47	8.29	7.3	0.263	0.008	0.061	0.332	0.015	3.1	5.41	2.05	0.511	0.038	2.27
20FA_06.4	21.96	28.47	8.29	7.3	0.263	0.008	0.061	0.332	0.015	3.1	5.41	2.05	0.511	0.038	2.27
20FA_06.5	21.96	28.47	8.29	7.3	0.263	0.008	0.061	0.332	0.015	3.1	5.41	2.05	0.511	0.038	2.27
20FA_07.1	21.61	29.76	8.27	7.3	0.268	0.009	0.071	0.348	0.012	4.8	5.26	1.93	0.548	0.023	1.79
20FA_07.2	21.61	29.76	8.27	7.3	0.268	0.009	0.071	0.348	0.012	4.8	5.26	1.93	0.548	0.023	1.79
20FA_07.3	21.61	29.76	8.27	7.3	0.268	0.009	0.071	0.348	0.012	4.8	5.26	1.93	0.548	0.023	1.79
20FA_07.4	21.61	29.76	8.27	7.3	0.268	0.009	0.071	0.348	0.012	4.8	5.26	1.93	0.548	0.023	1.79
20FA_07.5	21.61	29.76	8.27	7.3	0.268	0.009	0.071	0.348	0.012	4.8	5.26	1.93	0.548	0.023	1.79
20FA_08.1	21.84	28.23	8.34	7.4	0.251	0.007	0.082	0.34	0.011	5.2	4.31	2.04	0.489	0.028	1.7
20FA_08.2	21.84	28.23	8.34	7.4	0.251	0.007	0.082	0.34	0.011	5.2	4.31	2.04	0.489	0.028	1.7
20FA_08.3	21.84	28.23	8.34	7.4	0.251	0.007	0.082	0.34	0.011	5.2	4.31	2.04	0.489	0.028	1.7
20FA_08.4	21.84	28.23	8.34	7.4	0.251	0.007	0.082	0.34	0.011	5.2	4.31	2.04	0.489	0.028	1.7
20FA_08.5	21.84	28.23	8.34	7.4	0.251	0.007	0.082	0.34	0.011	5.2	4.31	2.04	0.489	0.028	1.7
20FA_09.1	21.82	29.14	8.33	7.8	0.266	0.011	0.054	0.331	0.007	3.8	4.82	2	0.481	0.016	1.03
20FA_09.2	21.82	29.14	8.33	7.8	0.266	0.011	0.054	0.331	0.007	3.8	4.82	2	0.481	0.016	1.03
20FA_09.3	21.82	29.14	8.33	7.8	0.266	0.011	0.054	0.331	0.007	3.8	4.82	2	0.481	0.016	1.03
20FA_09.4	21.82	29.14	8.33	7.8	0.266	0.011	0.054	0.331	0.007	3.8	4.82	2	0.481	0.016	1.03
20FA_09.5	21.82	29.14	8.33	7.8	0.266	0.011	0.054	0.331	0.007	3.8	4.82	2	0.481	0.016	1.03
20FA_10.1	21.95	28.72	8.3	7.4	0.251	0.013	0.031	0.295	0.007	4.6	4.69	1.8	0.375	0.015	0.83
20FA_10.2	21.95	28.72	8.3	7.4	0.251	0.013	0.031	0.295	0.007	4.6	4.69	1.8	0.375	0.015	0.83
20FA_10.3	21.95	28.72	8.3	7.4	0.251	0.013	0.031	0.295	0.007	4.6	4.69	1.8	0.375	0.015	0.83
20FA_10.4	21.95	28.72	8.3	7.4	0.251	0.013	0.031	0.295	0.007	4.6	4.69	1.8	0.375	0.015	0.83
20FA_10.5	21.95	28.72	8.3	7.4	0.251	0.013	0.031	0.295	0.007	4.6	4.69	1.8	0.375	0.015	0.83
20FA_11.1	22.18	29.15	8.38	8.1	0.241	0.011	0.021	0.273	0.005	4.9	4.14	1.41	0.361	0.012	0.43
20FA_11.2	22.18	29.15	8.38	8.1	0.241	0.011	0.021	0.273	0.005	4.9	4.14	1.41	0.361	0.012	0.43
20FA_11.3	22.18	29.15	8.38	8.1	0.241	0.011	0.021	0.273	0.005	4.9	4.14	1.41	0.361	0.012	0.43
20FA_11.4	22.18	29.15	8.38	8.1	0.241	0.011	0.021	0.273	0.005	4.9	4.14	1.41	0.361	0.012	0.43
20FA_11.5	22.18	29.15	8.38	8.1	0.241	0.011	0.021	0.273	0.005	4.9	4.14	1.41	0.361	0.012	0.43
20FA_12.1	22.29	30.11	8.33	7.7	0.198	0.012	0.022	0.232	0.006	5.7	8	1.47	0.372	0.016	0.45
20FA_12.2	22.29	30.11	8.33	7.7	0.198	0.012	0.022	0.232	0.006	5.7	8	1.47	0.372	0.016	0.45
20FA_12.3	22.29	30.11	8.33	7.7	0.198	0.012	0.022	0.232	0.006	5.7	8	1.47	0.372	0.016	0.45
20FA_12.4	22.29	30.11	8.33	7.7	0.198	0.012	0.022	0.232	0.006	5.7	8	1.47	0.372	0.016	0.45
20FA_12.5	22.29	30.11	8.33	7.7	0.198	0.012	0.022	0.232	0.006	5.7	8	1.47	0.372	0.016	0.45
20FA_13.1	22.16	31.26	8.36	7.6	0.152	0.015	0.028	0.195	0.007	6.4	7.54	1.49	0.349	0.013	0.45
20FA_13.2	22.16	31.26	8.36	7.6	0.152	0.015	0.028	0.195	0.007	6.4	7.54	1.49	0.349	0.013	0.45
20FA_13.3	22.16	31.26	8.36	7.6	0.152	0.015	0.028	0.195	0.007	6.4	7.54	1.49	0.349	0.013	0.45
20FA_13.4	22.16	31.26	8.36	7.6	0.152	0.015	0.028	0.195	0.007	6.4	7.54	1.49	0.349	0.013	0.45
20FA_13.5	22.16	31.26	8.36	7.6	0.152	0.015	0.028	0.195	0.007	6.4	7.54	1.49	0.349	0.013	0.45
20FA_14.1	22.11	30.18	8.35	7.9	0.116	0.011	0.024	0.151	0.006	5.8	4.63	1.57	0.333	0.011	0.32
20FA_14.2	22.11	30.18	8.35	7.9	0.116	0.011	0.024	0.151	0.006	5.8	4.63	1.57	0.333	0.011	0.32
20FA_14.3	22.11	30.18	8.35	7.9	0.116	0.011	0.024	0.151	0.006	5.8	4.63	1.57	0.333	0.011	0.32
20FA_14.4	22.11	30.18	8.35	7.9	0.116	0.011	0.024	0.151	0.006	5.8	4.63	1.57	0.333	0.011	0.32
20FA_14.5	22.11	30.18	8.35	7.9	0.116	0.011	0.024	0.151	0.006	5.8	4.63	1.57	0.333	0.011	0.32
20FA_15.1	22.48	30.76	8.38	8	0.105	0.008	0.02	0.133	0.006	5.9	6.03	1.46	0.473	0.011	0.26
20FA_15.2	22.48	30.76	8.38	8	0.105	0.008	0.02	0.133	0.006	5.9	6.03	1.46	0.473	0.011	0.26
20FA_15.3	22.48	30.76	8.38	8	0.105	0.008	0.02	0.133	0.006	5.9	6.03	1.46	0.473	0.011	0.26
20FA_15.4	22.48	30.76	8.38	8	0.105	0.008	0.02	0.133	0.006	5.9	6.03	1.46	0.473	0.011	0.26
20FA_15.5	22.48	30.76	8.38	8	0.105	0.008	0.02	0.133	0.006	5.9	6.03	1.46	0.473	0.011	0.26
20FA_16.1	21.93	30.61	8.4	8.2	0.112	0.009	0.028	0.149	0.006	3.1	4.96	2.03	0.341	0.012	0.4
20FA_16.2	21.93	30.61	8.4	8.2	0.112	0.009	0.028	0.149	0.006	3.1	4.96	2.03	0.341	0.012	0.4
20FA_16.3	21.93	30.61	8.4	8.2	0.112	0.009	0.028	0.149	0.006	3.1	4.96	2.03	0.341	0.012	0.4
20FA_16.4	21.93	30.61	8.4	8.2	0.112	0.009	0.028	0.149	0.006	3.1	4.96	2.03	0.341	0.012	0.4
20FA_16.5	21.93	30.61	8.4	8.2	0.112	0.009	0.028	0.149	0.006	3.1	4.96	2.03	0.341	0.012	0.4
20WI_01.1	12.56	25.54	8.23	8.8	0.271	0.007	0.053	0.331	0.021	3.1	6.2	2.1	0.526	0.053	3.24
20WI_01.2	12.56	25.54	8.23	8.8	0.271	0.007	0.053	0.331	0.021	3.1	6.2	2.1	0.526	0.053	3.24
20WI_01.3	12.56	25.54	8.23	8.8	0.271	0.007	0.053	0.331	0.021	3.1	6.2	2.1	0.526	0.053	3.24
20WI_01.4	12.56	25.54	8.23	8.8	0.271	0.007	0.053	0.331	0.021	3.1	6.2	2.1	0.526	0.053	3.24
20WI_01.5	12.56	25.54	8.23	8.8	0.271	0.007	0.053	0.331	0.021	3.1	6.2	2.1	0.526	0.053	3.24
20WI_02.1	12.49	25.85	8.22	8.8	0.278	0.009	0.053	0.34	0.022	3.5	5.78	1.91	0.537	0.044	3.17
20WI_02.2	12.49	25.85	8.22	8.8	0.278	0.009	0.053	0.34	0.022	3.5	5.78	1.91	0.537	0.044	3.17
20WI_02.3	12.49	25.85	8.22	8.8	0.278	0.009	0.053	0.34	0.022	3.5	5.78	1.91	0.537	0.044	3.17
20WI_02.4	12.49	25.85	8.22	8.8	0.278	0.009	0.053	0.34	0.022	3.5	5.78	1.91	0.537	0.044	3.17
20WI_02.5	12.49	25.85	8.22	8.8	0.278	0.009	0.053	0.34	0.022	3.5	5.78	1.91	0.537	0.044	3.17
20WI_03.1	12.38	26.23	8.26	8.7	0.269	0.01	0.057	0.336	0.021	5.4	5.61	1.83	0.518	0.042	2.87
20WI_03.2	12.38	26.23	8.26	8.7	0.269	0.01	0.057	0.336	0.021	5.4	5.61	1.83	0.518	0.042	2.87
20WI_03.3	12.38	26.23	8.26	8.7	0.269	0.01	0.057	0.336	0.021	5.4	5.61	1.83	0.518	0.042	2.87
20WI_03.4	12.38	26.23	8.26	8.7	0.269	0.01	0.057	0.336	0.021	5.4	5.61	1.83	0.518	0.042	2.87
20WI_03.5	12.38	26.23	8.26	8.7	0.269	0.01	0.057	0.336	0.021	5.4	5.61	1.83	0.518	0.042	2.87
20WI_04.1	12.42	26.55	8.28	8.8	0.276	0.01	0.063	0.349	0.021	5.6	5.76	1.76	0.568	0.043	2.87
20WI_04.2	12.42	26.55	8.28	8.8	0.276	0.01	0.063	0.349	0.021	5.6	5.76	1.76	0.568	0.043	2.87
20WI_04.3	12.42	26.55	8.28	8.8	0.276	0.01	0.063	0.349	0.021	5.6	5.76	1.76	0.568	0.043	2.87
20WI_04.4	12.42	26.55	8.28	8.8	0.276	0.01	0.063	0.349	0.021	5.6	5.76	1.76	0.568	0.043	2.87
20WI_04.5	12.42	26.55	8.28	8.8	0.276	0.01	0.063	0.349	0.021	5.6	5.76	1.76	0.568	0.043	2.87
20WI_05.1	12.33	26.84	8.26	8.8	0.289	0.01	0.056	0.355	0.019	6.7	6.18	1.87	0.572	0.037	2.8
20WI_05.2	12.33	26.84	8.26	8.8	0.289	0.01	0.056	0.355	0.019	6.7	6.18	1.87	0.572	0.037	2.8
20WI_05.3	12.33	26.84	8.26	8.8	0.289	0.01	0.056	0.355	0.019	6.7	6.18	1.87	0.572	0.037	2.8
20WI_05.4	12.33	26.84	8.26	8.8	0.289	0.01	0.056	0.355	0.019	6.7	6.18	1.87	0.572	0.037	2.8
20WI_05.5	12.33	26.84	8.26	8.8	0.289	0.01	0.056	0.355	0.019	6.7	6.18	1.87	0.572	0.037	2.8
20WI_06.1	12.37	29.28	8.3	8.7	0.24	0.008	0.047	0.295	0.016	6.5	6.14	1.49	0.557	0.036	1.56
20WI_06.2	12.37	29.28	8.3	8.7	0.24	0.008	0.047	0.295	0.016	6.5	6.14	1.49	0.557	0.036	1.56
20WI_06.3	12.37	29.28	8.3	8.7	0.24	0.008	0.047	0.295	0.016	6.5	6.14	1.49	0.557	0.036	1.56
20WI_06.4	12.37	29.28	8.3	8.7	0.24	0.008	0.047	0.295	0.016	6.5	6.14	1.49	0.557	0.036	1.56
20WI_06.5	12.37	29.28	8.3	8.7	0.24	0.008	0.047	0.295	0.016	6.5	6.14	1.49	0.557	0.036	1.56
20WI_07.1	12.39	29.41	8.3	8.7	0.238	0.008	0.042	0.288	0.014	6.1	6.12	1.71	0.427	0.032	1.53
20WI_07.2	12.39	29.41	8.3	8.7	0.238	0.008	0.042	0.288	0.014	6.1	6.12	1.71	0.427	0.032	1.53
20WI_07.3	12.39	29.41	8.3	8.7	0.238	0.008	0.042	0.288	0.014	6.1	6.12	1.71	0.427	0.032	1.53
20WI_07.4	12.39	29.41	8.3	8.7	0.238	0.008	0.042	0.288	0.014	6.1	6.12	1.71	0.427	0.032	1.53
20WI_07.5	12.39	29.41	8.3	8.7	0.238	0.008	0.042	0.288	0.014	6.1	6.12	1.71	0.427	0.032	1.53
20WI_08.1	13.48	28.61	8.31	8.7	0.226	0.006	0.034	0.266	0.016	4.3	6.48	1.58	0.348	0.034	1.49
20WI_08.2	13.48	28.61	8.31	8.7	0.226	0.006	0.034	0.266	0.016	4.3	6.48	1.58	0.348	0.034	1.49
20WI_08.3	13.48	28.61	8.31	8.7	0.226	0.006	0.034	0.266	0.016	4.3	6.48	1.58	0.348	0.034	1.49
20WI_08.4	13.48	28.61	8.31	8.7	0.226	0.006	0.034	0.266	0.016	4.3	6.48	1.58	0.348	0.034	1.49
20WI_08.5	13.48	28.61	8.31	8.7	0.226	0.006	0.034	0.266	0.016	4.3	6.48	1.58	0.348	0.034	1.49
20WI_09.1	13.9	30.08	8.33	8.8	0.194	0.006	0.031	0.231	0.014	4.7	5.16	1.71	0.293	0.025	1.23
20WI_09.2	13.9	30.08	8.33	8.8	0.194	0.006	0.031	0.231	0.014	4.7	5.16	1.71	0.293	0.025	1.23
20WI_09.3	13.9	30.08	8.33	8.8	0.194	0.006	0.031	0.231	0.014	4.7	5.16	1.71	0.293	0.025	1.23
20WI_09.4	13.9	30.08	8.33	8.8	0.194	0.006	0.031	0.231	0.014	4.7	5.16	1.71	0.293	0.025	1.23
20WI_09.5	13.9	30.08	8.33	8.8	0.194	0.006	0.031	0.231	0.014	4.7	5.16	1.71	0.293	0.025	1.23
20WI_10.1	12.54	30.15	8.33	8.7	0.206	0.007	0.024	0.237	0.013	5.2	5.15	1.63	0.36	0.03	1.12
20WI_10.2	12.54	30.15	8.33	8.7	0.206	0.007	0.024	0.237	0.013	5.2	5.15	1.63	0.36	0.03	1.12
20WI_10.3	12.54	30.15	8.33	8.7	0.206	0.007	0.024	0.237	0.013	5.2	5.15	1.63	0.36	0.03	1.12
20WI_10.4	12.54	30.15	8.33	8.7	0.206	0.007	0.024	0.237	0.013	5.2	5.15	1.63	0.36	0.03	1.12
20WI_10.5	12.54	30.15	8.33	8.7	0.206	0.007	0.024	0.237	0.013	5.2	5.15	1.63	0.36	0.03	1.12
20WI_11.1	13.28	32.47	8.34	8.7	0.284	0.009	0.029	0.322	0.01	5.9	4.13	1.42	0.366	0.025	1.02
20WI_11.2	13.28	32.47	8.34	8.7	0.284	0.009	0.029	0.322	0.01	5.9	4.13	1.42	0.366	0.025	1.02
20WI_11.3	13.28	32.47	8.34	8.7	0.284	0.009	0.029	0.322	0.01	5.9	4.13	1.42	0.366	0.025	1.02
20WI_11.4	13.28	32.47	8.34	8.7	0.284	0.009	0.029	0.322	0.01	5.9	4.13	1.42	0.366	0.025	1.02
20WI_11.5	13.28	32.47	8.34	8.7	0.284	0.009	0.029	0.322	0.01	5.9	4.13	1.42	0.366	0.025	1.02
20WI_12.1	13.49	33.88	8.33	8.9	0.249	0.008	0.023	0.28	0.011	5.3	4.16	1.37	0.367	0.021	0.94
20WI_12.2	13.49	33.88	8.33	8.9	0.249	0.008	0.023	0.28	0.011	5.3	4.16	1.37	0.367	0.021	0.94
20WI_12.3	13.49	33.88	8.33	8.9	0.249	0.008	0.023	0.28	0.011	5.3	4.16	1.37	0.367	0.021	0.94
20WI_12.4	13.49	33.88	8.33	8.9	0.249	0.008	0.023	0.28	0.011	5.3	4.16	1.37	0.367	0.021	0.94
20WI_12.5	13.49	33.88	8.33	8.9	0.249	0.008	0.023	0.28	0.011	5.3	4.16	1.37	0.367	0.021	0.94
20WI_13.1	12.64	33.04	8.36	8.6	0.267	0.012	0.033	0.312	0.014	4.6	5.12	0.97	0.431	0.027	0.94
20WI_13.2	12.64	33.04	8.36	8.6	0.267	0.012	0.033	0.312	0.014	4.6	5.12	0.97	0.431	0.027	0.94
20WI_13.3	12.64	33.04	8.36	8.6	0.267	0.012	0.033	0.312	0.014	4.6	5.12	0.97	0.431	0.027	0.94
20WI_13.4	12.64	33.04	8.36	8.6	0.267	0.012	0.033	0.312	0.014	4.6	5.12	0.97	0.431	0.027	0.94
20WI_13.5	12.64	33.04	8.36	8.6	0.267	0.012	0.033	0.312	0.014	4.6	5.12	0.97	0.431	0.027	0.94
20WI_14.1	13.32	33.12	8.41	8.9	0.289	0.012	0.031	0.332	0.013	4.8	4.11	0.98	0.467	0.024	0.94
20WI_14.2	13.32	33.12	8.41	8.9	0.289	0.012	0.031	0.332	0.013	4.8	4.11	0.98	0.467	0.024	0.94
20WI_14.3	13.32	33.12	8.41	8.9	0.289	0.012	0.031	0.332	0.013	4.8	4.11	0.98	0.467	0.024	0.94
20WI_14.4	13.32	33.12	8.41	8.9	0.289	0.012	0.031	0.332	0.013	4.8	4.11	0.98	0.467	0.024	0.94
20WI_14.5	13.32	33.12	8.41	8.9	0.289	0.012	0.031	0.332	0.013	4.8	4.11	0.98	0.467	0.024	0.94
20WI_15.1	13.05	32.29	8.35	8.8	0.287	0.012	0.031	0.33	0.012	4.7	4.12	1.01	0.472	0.026	0.89
20WI_15.2	13.05	32.29	8.35	8.8	0.287	0.012	0.031	0.33	0.012	4.7	4.12	1.01	0.472	0.026	0.89
20WI_15.3	13.05	32.29	8.35	8.8	0.287	0.012	0.031	0.33	0.012	4.7	4.12	1.01	0.472	0.026	0.89
20WI_15.4	13.05	32.29	8.35	8.8	0.287	0.012	0.031	0.33	0.012	4.7	4.12	1.01	0.472	0.026	0.89
20WI_15.5	13.05	32.29	8.35	8.8	0.287	0.012	0.031	0.33	0.012	4.7	4.12	1.01	0.472	0.026	0.89
20WI_16.1	13.07	32.44	8.42	8.6	0.278	0.013	0.029	0.32	0.009	4.3	4.12	1.12	0.517	0.02	0.72
20WI_16.2	13.07	32.44	8.42	8.6	0.278	0.013	0.029	0.32	0.009	4.3	4.12	1.12	0.517	0.02	0.72
20WI_16.3	13.07	32.44	8.42	8.6	0.278	0.013	0.029	0.32	0.009	4.3	4.12	1.12	0.517	0.02	0.72
20WI_16.4	13.07	32.44	8.42	8.6	0.278	0.013	0.029	0.32	0.009	4.3	4.12	1.12	0.517	0.02	0.72
20WI_16.5	13.07	32.44	8.42	8.6	0.278	0.013	0.029	0.32	0.009	4.3	4.12	1.12	0.517	0.02	0.72
DIN	Dissolved Inorganic Nitrogen
DIP	Dissolved Inorganic Phosphorus
Chl-a	Chlorophyll a
TOC	Total Organic Carbon
COD	Chemical Oxygen Demand
TN	Total Nitrogen
TP	Total Phosphorous
EI	Eutrophication Index
